# Supplementary material for: Energy and Heat for Medium-sized Cities in a Temperate Climate From a Small Nuclear Reactor and Solar Panels
Source: Research Square preprint supplement (doi:10.21203/rs.3.rs-956649/v1), 2021-11-30
Supplement: Supplementary file 2 [file 99dc3e5d6d3fb076b6ae5a84.docx]

**Data Availability Statement.**

- • Data on our calculations leading to the results in the article are available at <http://www.kzre.agh.edu.pl/publikacje/> and a set of Excel files named *data_Discover_Energy_Janczyszyn_Jaskolski*.
- • All files are named to indicate what the files are about.
